1 **Biochemical, molecular and antibiotic resistance profile of multi-potential toluene**  
2 **metabolizing bacteria isolated from tannery effluents**

3 Fatima Muccee<sup>1</sup>, Samina Ejaz<sup>1\*</sup>

4  
5 <sup>1</sup>Department of Biochemistry and Biotechnology, The Islamia University of Bahawalpur,  
6 Bahawalpur, Pakistan. Phone: 092 0321-4223806, E-mail: [biology3212@yahoo.com](mailto:biology3212@yahoo.com)

7  
8 <sup>1\*</sup>Department of Biochemistry and Biotechnology, The Islamia University of  
9 Bahawalpur, Bahawalpur, Pakistan. Phone: 092 301 6812346, 092 62 9255574.  
10 E-mail: [saminaejazsyed@yahoo.com](mailto:saminaejazsyed@yahoo.com), [samina.ejazsyed@iub.edu.pk](mailto:samina.ejazsyed@iub.edu.pk)

11  
12  
13 **Corresponding author\***: Samina Ejaz

14 E-mail: [saminaejazsyed@yahoo.com](mailto:saminaejazsyed@yahoo.com), [samina.ejazsyed@iub.edu.pk](mailto:samina.ejazsyed@iub.edu.pk)

15  
16 **Abstract:**

17 The focus of present study was to isolate and characterize bacteria which can be  
18 effectively used for toluene, a highly recalcitrant pollutant, bioremediation. For isolation  
19 of bacteria from the tannery effluents selective enrichment and serial dilution methods  
20 were employed. The isolated bacteria were subjected to growth curve analysis, estimation  
21 of toluene removal efficiencies, biochemical tests, antibiotic sensitivity assays and  
22 molecular characterization based upon 16S rRNA gene. The rRNA genes sequences were  
23 analyzed through BLAST to determine similarity index of isolates with bacterial database  
24 sequences. To trace the evolutionary history, phylogenetic trees were constructed using  
25 MEGA version 7. Total twenty toluene metabolizing bacteria (IUBT1-2, 4-12, 16, 19, 21,  
26 23-26, 28 and 30) were isolated and characterized. Their rRNA gene sequences have  
27 been submitted to Genbank. Fifteen of the twenty isolates showed homology to

28 *Brevibacillus agri* strain NBRC 15538, four found similar to *Bacillus paralicheniformis*  
29 strain KJ-16 and one homologous to *Burkholderia lata* strain 383. All bacterial isolates  
30 were resistant to chloramphenicol but sensitive to teicoplanin and linezolid. However,  
31 few (i. e.; IUBT9 and 26) were sensitive to oxacillin. Biochemical characterization  
32 indicated all bacteria positive for alkaline phosphatases (100%). While many were found  
33 positive for p-nitrophenyl N-acetyl  $\beta$ , D-glucosaminidase (35%), hydroxyproline  $\beta$ -  
34 naphthylaminopeptidase (15%), esculinase (65%), mannitol (75%), sorbitol (95%) and  
35 inulin (90%) fermentation. Biochemical profile suggests the use of isolated bacteria for  
36 future exploitation in several fields like bioremediation of toluene, ethanol production,  
37 biomass hydrolysis, biosensors, biofertilizers, as a marker for milk pasteurization in dairy  
38 industries and evaluation of soil quality.

### 39 **Importance**

40 Toluene is a highly toxic environmental pollutant. We have isolated bacteria which can  
41 be effectively used for the removal of toluene from environmental resources. Moreover,  
42 these bacteria are capable to produce many valuable enzymes which can be used in many  
43 industrial processes for the production of a wide range of products. Further study may  
44 help to exploit these bacterial for the benefit of humanity.

45

46 **Key words:** toluene metabolizing bacteria, bioremediation, toluene removal efficiency,  
47 *Brevibacillus agri*, *Bacillus paralicheniformis*, *Burkholderia lata*, rRNA profiling

48

## 49 **Introduction**

50 Toluene (methylbenzene) is an omnipresent pollutant and is a cause of concern due to its  
51 resistance to chemical, photolytic and biological degradation, lipophilic nature,  
52 bioaccumulation, long-range transport and wide range adverse effects on environment,  
53 wild life, biota and human health (1). Being lipophilic, it gets accumulated in lipid bilayer  
54 of cell membrane and alters the structure of living cells (2). Toluene is a man-made  
55 hydrocarbon and its major sources in urban air environment are industrial effluents and  
56 motor vehicle emissions (3). It is used as solvent and is essential component of printing  
57 inks, adhesives, rubber, disinfectants, leather tanners, petrol, paints, lacquers and cleaning  
58 agents. Moreover, toluene is added to gasoline fuels to boost octane number (4).

59 Breathing in indoor or ambient air around toluene sources is the cause of toluene  
60 exposure and may lead to various health issues. Low level exposure (200 ppm) promotes  
61 headache, fatigue, slowed reflexes and paresthesia while exposure to moderate levels of  
62 toluene (600 ppm) elevate feelings of confusion and high levels (800 ppm) of toluene  
63 lead to euphoria (5). The other chronic consequences of toluene exposure include  
64 teratogenic effects, neurotoxic and immunotoxic effects, dementia and toluene  
65 leukoencephalopathy (6-8).

66 Due to associated health risks, it is essential to mitigate toluene. Various traditional  
67 techniques like soil vapor extraction, incineration, chemical oxidation, ultraviolet  
68 oxidation and nanotech remedial technology etc. have been used for this purpose (9-12).  
69 However, conventional approaches due to associated limitations like partial toluene  
70 degradation, high operating and maintenance cost, maximum disturbance to land,

71 production of more hazardous substances, transport of contaminated material and  
72 increased exposure to toluene for the workers are not preferentially used.

73 The bioremediation has become a preferable technique for toluene detoxification. The  
74 process of bioremediation involves scavenging of environmental (water or soil) organic  
75 pollutants by naturally occurring or deliberately introduced cultured microbes which are  
76 capable to consume and metabolize the contaminants and thus neutralize the environment  
77 (13). The bioremedial approach is; far less disruptive and invasive, can be improved by  
78 using genetically engineered microorganisms, avoids further pollution, more accessible  
79 and cheaper alternative (14). Utilization of bacteria to eradicate environmental pollution  
80 is beneficial due to their rapid growth rate, broad metabolic capabilities and diverse  
81 enzymes which are active in aerobic as well as anaerobic environments. Moreover  
82 bacteria can survive under wide range of temperature and salinity conditions.

83 Variety of toluene metabolizing bacterial species isolated from different sources has been  
84 reported (Table 1).

85 Being a highly reduced molecule, toluene needs to be oxidized before its assimilation.  
86 For this purpose, bacteria have adopted diverse degradative pathways selectively  
87 operating under aerobic or anaerobic conditions (Table 2).

88 Although a number of toluene metabolizing bacteria have been isolated and studied, there  
89 is need to find more highly efficient and environment friendly bacteria. Under different  
90 habitats, bacteria express different biodegradative enzymes and pathways (15). Moreover,  
91 utilization of bacterial consortia with broad spectrum of enzymes will be proven more  
92 effective for toluene remediation (16).

93 The industries which manufacture and use toluene are the primary sources of toluene  
94 pollution in the environment. Toluene is a commonly used adhesive in leather industry.  
95 Hence, leather tanning and processing industries and manufacturing units of footwears,  
96 leather bags, leather furniture and other miscellaneous leather goods are the major  
97 sources of toluene exposure. Knowing thing in present study, tannery effluent was  
98 selected as a source sample for the isolation of toluene metabolizing bacteria. It was  
99 hypothesized that we might find some novel bacteria capable to degrade toluene in a  
100 more effective and versatile manner in tannery industry effluents. The accomplishment of  
101 this project might provide an eco-friendly way out to reclaim toluene contaminated  
102 environmental resources.

### 103 **Materials and methods:**

#### 104 **Medium and growth conditions:**

105 For bacterial isolation, standard culture enrichment technique was employed by involving  
106 use of carbon deficient minimal salt media (17). The carbon deficient minimal salt  
107 medium ( $4\text{ g L}^{-1} \text{ KH}_2\text{PO}_4$ ;  $4\text{ g L}^{-1} \text{ Na}_2\text{HPO}_4$ ;  $2\text{ g L}^{-1} \text{ NH}_4\text{Cl}$ ;  $0.2\text{ g L}^{-1} \text{ MgCl}_2$ ;  $0.001\text{ g L}^{-1}$   
108  $\text{CaCl}_2$ ;  $0.001\text{ g L}^{-1} \text{ FeCl}_3$ ) was prepared and autoclaved at  $121\text{ }^\circ\text{C}$  for 20 min. Prior to  
109 inoculation, the medium was supplemented with 1% (v/v) toluene as the only carbon  
110 source. The pH of medium was maintained at 6.8. Isolated bacteria were grown  
111 aerobically on this toluene supplemented media at  $50\text{ }^\circ\text{C}$ .

#### 112 **Morphology:**

113 Morphological aspects of isolates like gram staining and bacterial cell shape were  
114 documented. The colony forming units (CFUs) were also calculated for all these isolates.

115 **Growth rate:**

116 The growth rate was evaluated indirectly by assessment of turbidity as optical density  
117 (OD). The optical density was measured at 600 nm and at different time intervals using  
118 UV- visible spectrophotometer. The optical density was plotted versus time to obtain  
119 growth curves and determine growth behavior of each isolate.

120 **Toluene removal assay:**

121 For determining the toluene removal rate of bacterial isolates, initially the bacterial  
122 culture was centrifuged. The supernatant containing the residual toluene of the medium  
123 (3ml) was extracted using 3ml n-hexane. Followed by this, the n- hexane containing  
124 toluene was separated using a separating funnel. The optical density of toluene was  
125 measured against a blank at 260 nm wavelength (Supplementary Data Figure 1). Medium  
126 containing toluene without bacterial culture was used as blank. Toluene degradation  
127 efficiency has been calculated by following formula;

128 
$$\text{Toluene degradation efficiency (\%)} = [ T_i - T_f / T_i ] \times 100$$

129 Whereas;  $T_i$  = initial absorbance of toluene

130  $T_f$  = final absorbance of toluene

131 **Morphological and Biochemical characterization:**

132 The isolated bacteria were characterized by gram staining, colony morphology (18) on  
133 nutrient agar medium and morphological characteristics. For biochemical identification  
134 of bacteria, a qualitative micromethod of Remel RapID STR System (19) was used. In  
135 this method, toluene metabolizing bacteria were subjected to different biochemical tests.

136 i. e.; arginine dehydrolase test, esculinase test, mannitol fermentation test, sorbitol  
137 fermentation test, raffinose fermentation test, inulin fermentation test,  $\rho$ -nitrophenyl- $\alpha$ ,D-  
138 galactosidase test, Tyrosine  $\beta$ -naphthylamidase test,  $\rho$ -Nitrophenyl- $\alpha$ ,D-glucosidase test,  
139  $\rho$ -Nitrophenyl-n-acetyl- $\beta$ ,D-glucosaminidase test, Lysine  $\beta$ -naphthylamidase test,  
140 alkaline phosphatase test and pyrrolidonyl peptidase test.

#### 141 **Antibiotic susceptibility test:**

142 Antibiotic test was performed for all the isolated bacteria by using disc diffusion method  
143 (20). Antibiotics tested were teicoplanin (30  $\mu$ g), linezolid (30  $\mu$ g), linezolid (10  $\mu$ g),  
144 oxacillin (1  $\mu$ g) and chloramphenicol (30  $\mu$ g).

#### 145 **Molecular characterization by 16S rRNA gene sequence analysis:**

146 For molecular characterization of bacterial isolates their genomic DNA was extracted by  
147 organic method (21). The 16S rDNA gene was amplified by polymerase chain reaction  
148 (PCR) using the rDNA specific primers F1 and R1 (Supplementary Data Table 1). The  
149 region of 16S rRNA gene targeted by these primers is shown (Supplementary data Figure  
150 2). In 50  $\mu$ l of PCR reaction mixture, 50 ng of template DNA, 5  $\mu$ l of 10X PCR reaction  
151 buffer (Mg<sup>++</sup> free), 5  $\mu$ l of MgCl<sub>2</sub>, 1  $\mu$ l of 10mM dNTPs, 2  $\mu$ l of 10 pM forward primer, 2  
152  $\mu$ l of 10 pM reverse primer, 0.25  $\mu$ l of Taq DNA polymerase and 29.75  $\mu$ l of nuclease  
153 free water was used. PCR amplification conditions were as follows; initial denaturation at  
154 95 °C for 5 min, , 38 cycles consisting of denaturation at 94 °C for 40 seconds, annealing  
155 at 58 °C for 40 seconds and extension at 72 °C for 30 seconds. The final extension of  
156 PCR products was carried out at 72 °C for 10 min. After PCR amplification, the PCR  
157 products were resolved on agarose gel. The PCR products were purified by Monarch

158 DNA Gel Extraction Kit and sequenced bidirectionally using sequencer based on  
159 principle of Sangers Chain Termination. For this purpose, samples were sent to  
160 Macrogen, Korea. FASTA sequences obtained from Macrogen were subjected to  
161 microbial databases similarity searches through NCBI (National Center for  
162 Biotechnology Information) BLAST analysis  
163 (<http://blast.ncbi.nlm.nih.gov/blast/Blast.cgi>). Sequences of highest similarity obtained  
164 through BLAST analysis were recorded. Clustal omega multiple sequence alignment  
165 software (22) was used to align the sequences. The sequences were refined by removing  
166 the gaps and only ungapped aligned regions were analyzed by MEGA7 software to  
167 perform phylogenetic analysis of the identified bacteria. Phylogenetic trees were  
168 constructed to show the evolutionary relationship among the identified bacteria. Different  
169 parameters used for phylogenetic tree construction included neighbor joining statistical  
170 method, maximum composite likelihood substitution method and Bootstrap analysis with  
171 1000 replicates.

172 Sequences of twenty isolates have been submitted to NCBI and accession numbers  
173 assigned are; IUBT1 (MH014864), IUBT2 (MG241284), IUBT4 (MH014871), IUBT5  
174 (MH014859), IUBT6 (MH266116), IUBT7 (MH201270), IUBT8 (MG190354), IUBT9  
175 (MG190357), IUBT10 (MG263995), IUBT11 (MH266117), IUBT12 (MG263996),  
176 IUBT16 (MG190391), IUBT19 (MH014861), IUBT21 (MH014862), IUBT23  
177 (MG263997), IUBT24 (MG190870), IUBT25 (MH266118), IUBT26 (MG263998),  
178 IUBT28 (MH014868) and IUBT30 (MH014869).

## 179 **Results**



180 **Morphology:**

181 All the bacteria were found to be gram positive and rod shaped. Their Colony Forming  
182 Units (CFUs) have been calculated and are given (Supplementary Data Table 2). The  
183 bacteria IUBT1, IUBT2, IUBT4 and IUBT5 were isolated from the plate inoculated with  
184 original culture without any dilution.

185 **Molecular characterization of toluene metabolizing bacteria:**

186 Ribotyping of toluene metabolizing bacteria revealed three groups among twenty isolates  
187 (Figure 1). Group 1 comprised of single isolate IUBT1, homologous to *Burkholderia lata*  
188 strain 383. Group 2 included fifteen bacteria homologous to *Brevibacillus agri* strain  
189 NBRC 15538 while group 3 contained isolates IUBT4, IUBT24, IUBT28 and IUBT30  
190 showing homology to *Bacillus paralicheniformis* strain KJ-16. All sequences were  
191 deposited to Genbank database ([www.ncbi.nlm.nih.gov/genbank](http://www.ncbi.nlm.nih.gov/genbank)) and assigned accession  
192 numbers.

193 **Phylogenetic analysis of bacterial isolates:**

194 To study the evolutionary relationships between the isolated toluene metabolizing  
195 bacteria phylogenetic trees were constructed. Bacterium IUBT1 from group 1, was  
196 assigned to genus *Burkholderia*. Study of its evolutionary relationship revealed its  
197 common ancestry with *Burkholderia lata strain 383* (Accession number NR 102890) as  
198 both originated from the same node (Figure 2). The similarity percentage between two  
199 strains was 99%.

200 Four bacterial isolates IUBT4, IUBT24, IUBT28 and IUBT30 were assigned to genus  
201 *Bacillus*. All shared common ancestor, belonged to same clade and shared close  
202 similarity with *Bacillus paralicheniformis* strain KJ-16 (Figure 3).

203 Among the 20 isolates in this study, 15 were assigned to genus *Brevibacillus* in Group 2.  
204 The phylogenetic study revealed that IUBT7 is distantly related with rest of the isolates  
205 and same is the case of IUBT9. Both of these are not sharing clade with any other isolate.  
206 IUBT12 and 19 are sharing the same clade. IUBT21 and IUBT23 are related through  
207 strong bootstrap value of 99. IUBT5 and IUBT11 are also closely related because they  
208 are converging at a common ancestor. IUBT6 is distantly related with IUBT26 through  
209 bootstrap value of 22. IUBT2 is related with *Bacillus glycinifermentans* through strong  
210 bootstrap value of 100. IUBT8 and IUBT10 are more related with each other as  
211 compared to IUBT16 and IUBT25. IUBT25 is sharing the same lineage with  
212 *Brevibacillus gelatini* strain through bootstrap value of 48 (Figure 4).

### 213 **Biochemical characterization:**

214 The isolated bacteria were screened for fourteen biochemical tests. All of these were  
215 negative for arginine dehydrolase (ARG) test, raffinose fermentation (RAF) test,  $\rho$ -  
216 nitrophenyl- $\alpha$ , D-galactoside (GAL) test, tyrosine  $\beta$ -naphthylamide (TYR) test,  $\rho$ -  
217 nitrophenyl- $\alpha$ , D-glucoside (GLU) test and lysine  $\beta$ -naphthylamide (LYS) test. The  
218 positive response was observed for the esculinase (ESC) test, mannitol fermentation test  
219 (MNL), sorbitol fermentation test (SBL), inulin fermentation test (INU), hydroxyproline  
220  $\beta$ -naphthylamide (HPR) test,  $\rho$ -nitrophenyl-n-acetyl- $\beta$ -D-glucosaminide (NAG) test,  $\rho$ -  
221 nitrophenyl phosphate (PO<sub>4</sub>) test and pyrrolidine  $\beta$ -naphthylamide (PYR) test. Thirteen

222 bacteria were esculinase producers and can be exploited for improved ethanol production  
223 through increased saccharification of cellulose. All except two (IUBT8 and 16) were  
224 capable of fermenting inulin and fifteen (IUBT2, 4, 5-7, 9, 11-12, 19, 21, 2-26 and 30)  
225 were mannitol fermenting bacteria. All the isolates were positive for sorbitol fermentation  
226 except IUBT16. Seven were n-acetyl glucosaminidase producers and possess potential for  
227 future applications like single cell protein (SCP) production, for conversion of chitinous waste  
228 into biofertilizers and as an additive in food industry. Only two (IUBT5 and 19) were  
229 hydroxyproline  $\beta$ -naphthylamidases producers and can be utilized in pharmaceutical  
230 industries. All isolates were positive for  $\text{PO}_4$  test and thus can be employed in  
231 diagnostics immunoassays, in biosensors for environment monitoring, as biofertilizers, in  
232 soil quality evaluation, in limnological studies and dairy industries. Only one bacterium  
233 IUBT5 was positive for PYR test and can be utilized in protein sequencing to free the  
234 amino terminal amino acid being blocked by pyrrolidonyl group. This analysis helped us  
235 to find out unique characteristics of Group 2 and Group 3 members. Biochemical  
236 behavior of IUBT10, IUBT8, IUBT19, IUBT5 and IUBT16 was different from each  
237 other and from ten other *Brevibacilli* of Group 2. So, group 2 members were further  
238 categorized into two major groups. The isolates IUBT2, IUBT6, IUBT7 and IUBT26  
239 were similar biochemically so placed in the group G2B. These bacteria were sorbitol and  
240 inulin fermenting and esculinase, p-nitrophenyl-n-acetyl- $\beta$ -D-glucosaminidase and p-  
241 nitrophenyl phosphatase producers. The IUBT9, IUBT11, IUBT12, IUBT21, IUBT23  
242 and IUBT25 were placed in group G2C as they all were mannitol, sorbitol and inulin  
243 fermenting and esculinase and p-nitrophenyl phosphatase producers. All the four isolates  
244 from Group III were found biochemically different. Hence, biochemical analysis  
245 confirmed their distinctiveness (Supplementary Data Table 3).

246 **Growth study:**

247 To sort out the unique bacteria among those having same molecular and biochemical  
248 profile their growth behavior was studied. Assuming that same bacteria must possess  
249 same growth pattern, the isolates IUBT2, IUBT26, IUBT11 and IUBT12 were found  
250 unique in their growth behavior (Supplementary data Table 4). Results helped to identify  
251 three groups of bacteria G2B2 consisting of IUBT6 and IUBT7, G2C3 containing IUBT9  
252 and IUBT21 and G2C4 including IUBT23 and IUBT25 (Supplementary Data Figure 3).  
253 The members of each group exhibited similar growth pattern hence, they might be the  
254 same bacteria.

255 **Toluene removal efficiency:**

256 Toluene removal efficiency assay served as fourth layer of screening and helped to  
257 differentiate among bacteria exhibiting similarity in molecular, biochemical and growth  
258 behaviors. The toluene removal potentials for IUBT6, IUBT7, IUBT23 and IUBT25 were  
259 found to be  $83\% \pm 1.41$ ,  $93\% \pm 4.95$ ,  $28\% \pm 4.24$  and  $45\% \pm 10.6$  respectively  
260 (Supplementary data Figure 4). The IUBT9 and IUBT21 had toluene removal potentials:  
261  $83\% \pm 2.12$  and  $83\% \pm 0.70$ , respectively. However, IUBT9 and IUBT2 might be the  
262 same bacteria due to similarity in their molecular aspects, biochemical behavior, growth  
263 pattern and toluene removal efficiencies.

264 **Antibiotic profile:**

265 All of the twenty isolates were tested for their antibiotic susceptibility (Supplementary  
266 Data Table 5). All of the isolates were sensitive to teicoplanin and linezolid. Among these  
267 isolates, 100% were resistant to chloramphenicol and 90% to oxacillin. Only two of

268 these, IUBT9 and IUBT26 showed sensitivity to oxacillin and 100% showed sensitivity  
269 to teicoplanin and linezolid. The zone of inhibition was measured for the antibiotics to  
270 which bacteria exhibited susceptibility. The maximum zone of inhibition was recorded 39  
271 mm against the antibiotic linezolid (10 $\mu$ g) in case of IUBT19. In case of teicoplanin,  
272 linezolid (30 $\mu$ g) and oxacillin, maximum zones of inhibition were 35 mm (IUBT6), 37  
273 mm (IUBT16, 26 and 30) and 30 mm (IUBT26), respectively. A comparison of zone of  
274 inhibitions for different antibiotics is given (Supplementary Data Figure 5).

## 275 **Discussion:**

276 Grown on minimal salt medium (MSM) supplemented with 1% toluene, morphological,  
277 biochemical and molecular analyses of all isolates (n=20) revealed their capability to  
278 metabolize toluene as the only source of carbon.

## 279 **Morphology**

280 Morphologically these strains were found to be rod shaped and gram positive bacteria.  
281 Our results are consistent with earlier studies because most of the toluene metabolizing  
282 bacteria reported in literature are gram positive: Bacterium Ex-DG74 (17),  
283 *Mycobacterium sp.* IBB<sub>pol</sub> (23), *Mycobacterium* strains T103 and T104 (24). However,  
284 contrary to our findings previous studies have reported few toluene metabolizing gram  
285 negative bacteria (23).

## 286 **Molecular characterization**

287 Traditional bacterial identification based on phenotypic characteristics is not a precise  
288 method in comparison with genotypic tools. Similarly through the 16S rRNA gene  
289 profiling the poorly described, phenotypically anomalous, rarely isolated strains and even

290 uncultured strains can be identified (25). In present study, the molecular characterization  
291 of isolates showed homology with three different genera and species. i. e.; *Brevibacillus*  
292 *agri*, *Burkholderia lata* and *Bacillus licheniformis*. The *Burkholderia* and *Bacillus*  
293 *licheniformis*, are known to possess toluene degradation ability (26-28). Although a  
294 thermophilic bacterium (growth temp. 45 °C) *Brevibacillus agri* strain 13 has been  
295 reported to grow and tolerate high concentrations of toluene (5% and 20%, v/v) but it was  
296 not capable of utilizing toluene as sole carbon source (29). Hence, to the best of our  
297 knowledge, this is the first study reporting isolation of toluene metabolizing *Brevibacillus*  
298 *agri* strain. Similarity score of less than 97% could be considered as an indicative of a  
299 new species within a known genus. Moreover, isolate IUBT7 with 89% similarity could  
300 be considered as an archetype of new species within the genus *Brevibacillus*.

### 301 **Biochemical characterization**

302 To better comprehend the ongoing metabolic activities isolates were subjected to  
303 biochemical analysis. Although previous studies have performed biochemical  
304 characterization of toluene metabolizing bacteria through standard biochemical tests (30,  
305 31). Esculinase, hydroxyproline  $\beta$ -naphthylamidase and alkaline phosphatase activities of  
306 toluene degrading bacteria, have not been yet studied.

307 Esculinase (ESC) test is an assay used for the detection of beta-glucosidase enzyme, also  
308 known as esculinase. It hydrolyzes esculin into esculetin and dextrose. Followed by this  
309 esculetin and ferric chloride of the medium react and black brown color is produced.  
310 Thirteen isolates (IUBT1-2, 6-7, 9-12, 16, 21, 23, 25-26) showed positive result for  
311 esculinase. Few gram positive strains like *Enterococcus faecium*, *Enterococcus faecalis*

312 and *Streptococcus bovis* are known to be positive for esculinase test. This test aids in  
313 differentiating among few families of *Enterobacteriaceae*. Esculinase or  $\beta$ - glucosidase  
314 enzyme due to its hydrolytic activity can be effectively used for biofuel production,  
315 synthesis of antitumor agent (aglycone moiety), for removing bitterness from citrus fruit  
316 juices, cooked soybean syrup, unripe olive and for detoxification of cassava. By reverse  
317 hydrolysis, this enzyme can also be used for synthesis of o-alkyl glucoside which can be  
318 used in food industry, extraction of organic dyes, in cosmetics and pesticides formulation  
319 (32). In this study, thirteen isolates (IUBT1-2, 6-7, 9-12, 16, 21, 23 and 25) have been  
320 found positive for this test. As esculinase enzyme has wide range of applications, hence  
321 the isolates found positive hold multipurpose potential.

322 Mannitol, sorbitol, raffinose and inulin fermentation tests were performed to detect the  
323 capability of bacteria to utilize the carbohydrate substrates like mannitol, sorbitol,  
324 raffinose and inulin respectively. Bacteria usually transform mannitol, raffinose and  
325 inulin into acidic products which reduce the pH of medium, change the color of indicator  
326 added to the medium. Our 75% isolates were positive for mannitol test, 95% were  
327 positive for sorbitol test, 90% were positive for inulin test while none of the isolates  
328 showed positive result for raffinose test. In literature, toluene metabolizing bacteria have  
329 been reported to exhibit mannitol and sorbitol fermenting potential (31). However, this is  
330 the first study reporting on inulin and raffinose fermenting capability of toluene  
331 metabolizing bacteria. Bacterial inulases have tremendous industrial applications and can  
332 be utilized for the production of fructose syrup, gluconic acid, inulooligosaccharides,  
333 lactic acid, mannitol, ethanol and 2,3- butanediol (33). Hence, the isolates found to  
334 possess inulases can be exploited for these purposes.

335 Hydroxyproline  $\beta$ -naphthylamide (HPR) test detects the presence of hydroxyproline  $\beta$ -  
336 naphthylamidase enzyme which catalyzes the hydrolysis of hydroxyproline  $\beta$ -  
337 naphthylamide and  $\beta$ -naphthylamine. In present study, three bacterial isolates were found  
338 positive for this test.

339 The  $\rho$ -Nitrophenyl-n-acetyl- $\beta$ -D-glucosaminide (NAG) test is a biochemical assay to  
340 detect  $\rho$ -Nitrophenyl-n-acetyl- $\beta$ -D-glucosaminidase (NAGase) in bacteria. This enzyme  
341 hydrolyzes  $\rho$ -nitrophenyl substituted glycoside and releases  $\rho$ -Nitrophenol. In present  
342 study, seven isolates showed positive result for this test. Few toluene metabolizing and  
343 glucoaminidase producing strains have been reported (31). A strain *Burkholderia*  
344 *pseudomallei* is also known for the production of this enzyme (34). This enzyme can be  
345 employed for analyzing complex sugar chains in glycopeptides and glycoproteins,  
346 synthesis of variety of biologically important compounds and as biocontrol agents etc  
347 (35).

348 The  $\rho$ -nitrophenyl phosphate ( $\text{PO}_4$ ) test confirms the presence of phosphatase enzyme  
349 which expedites the breakdown of  $\rho$ -nitrophenyl phosphate to yellowish  $\rho$ -nitrophenol.  
350 All the bacterial isolates of our study analyzed for this test showed positive result. This  
351 enzyme has diverse applications such as in immunoassays, biomedical industry due to its  
352 resistance to denaturation, biosensors for environmental monitoring, as a marker for  
353 adequate milk pasteurization, bioremediation agent to mineralize organophosphates and  
354 evaluation of heavy metals precipitation from industrial effluents (36)

355 Pyrrolidine beta-naphthylamide (PYR) test facilitates the detection of enzyme L-  
356 pyrroglutamyl amino-peptidase found in *Streptococcus pyogenes* which hydrolyzes the



357 pyrrolidine  $\beta$ - naphthylamide yielding  $\beta$ - naphthylamide. In present study, only one  
358 bacterium showed positive result for this test. This enzyme has potential applications in  
359 protein sequencing to release the amino acid blocked by pyrrolidonyl group at N-  
360 terminus and bacterial diagnosis (37).

361 The isolates of present study being the source of variety of enzymes can be destined for  
362 utilization in scientific and industrial entities. They can be employed in areas like clinical  
363 diagnosis, food industry, dairy technology, agroecosystem, molecular biology, genetic  
364 engineering and environmental remediation of pollutants.

#### 365 **Growth study:**

366 Majority of the isolates (n=14) were slow growing and found to exhibit logarithmic  
367 growth until 48 hours (IUBT3, 19 and 24), 51 hours (IUBT1, 26 and 28), 68 hours  
368 (IUBT5, 8-9, 12, 14 and 21) and even until 74 hours (IUBT30). Consistent with our  
369 study, four slow growing toluene metabolizing bacteria, exhibiting slow growth rate with  
370 exponential growth phase until 90 hours, have been reported (38). The isolates IUBT2,  
371 IUBT4, IUBT5, IUBT6 and IUBT8 showed 0.4-0.5 optical density (OD) at 600 nm  
372 during the log phase which is consistent with the optimum optical density (OD) of  
373 toluene metabolizing bacteria reported in literature (38). The maximum OD at 600 nm  
374 reported for toluene metabolizing bacteria so far is 0.8 (17). While in present study  
375 IUBT16 and IUBT25 showed OD of 0.9 and IUBT9, IUBT12, IUBT21, IUBT23,  
376 IUBT24 and IUBT28 showed OD of 1.0. Hence, present work reports the maximum  
377 biomass growth of toluene metabolizing bacteria.

#### 378 **Toluene removal efficiency:**

379 Toluene removal efficiencies of bacteria were determined by toluene removal assay. The  
380 isolates having highest toluene removal efficiency (Figure 2) were IUBT16 ( $93\% \pm 1.41$ ),  
381 IUBT1 ( $90\% \pm 2.83$ ) and IUBT19 ( $90\% \pm 0$ ), IUBT2 ( $89\% \pm 1.41$ ), and IUBT4 ( $89\% \pm$   
382  $0.71$ ). The observed toluene removal efficiencies are consistent with those reported in  
383 earlier literature .i.e.; 92.4% for bacterium J2, 84.8% for bacterium J6 (39). However, the  
384 highest toluene metabolizing efficiencies (99 and 98%) have been reported so far for  
385 *Rhodococcus erythropolis* and *Alcaligenes xylosoxidans* respectively  
386 (40, 41). The isolates with minimal toluene removal were found to be IUBT23 ( $28\% \pm$   
387  $4.24$ ) and IUBT26 ( $50\% \pm 9.19$ ). However, in literature minimum toluene removal  
388 efficiency has been reported to be 43% and 49% in rhizosphere bacterial community (42).

### 389 **Antibiotic profiling:**

390 All of the twenty bacteria reported can be used for toluene remediation. But there may be  
391 some associated potential risks due to their virulent nature. Although this study has not  
392 detected virulence status of isolates, the antibiotic resistance profiling may give us a clue  
393 about their user friendly nature. Environment friendly bacteria should not possess  
394 antibiotic resistance. Moreover, the exploitation of these bacteria to remediate toluene  
395 can be decided on the bases of their sensitivity as well as resistance to the drugs.  
396 Application of a whole bacterial cell to deal unfavorable toluene burden can only be  
397 suggested, if it is drug sensitive. Hence, it was crucial to test the isolated bacteria for  
398 antibiotic resistance. All of the bacteria were gram positive so we selected the antibiotics  
399 which are most commonly used for treatment of infections caused by gram positive  
400 bacteria .i.e; teicoplanin, linezolid, oxacillin and chloramphenicol. All of the bacteria in  
401 our study have shown resistance to some of the antibiotics so the whole cell remediation

402 will not be recommended. Rather their enzymes and genes associated with toluene  
403 degrading pathways can be beneficially used and three approaches should be followed in  
404 this regard.

405 (a) If the required enzymes are extracellular then nanoparticles can be synthesized by  
406 using supernatant and can be destined for remediation.

407 (b) If intracellular enzymes are associated with toluene catabolism then these  
408 enzymes and other proteins can be purified from cell lysate for synthesis of  
409 nanoparticles.

410 (c) Associated genes can also be identified and can be cloned into any environmental  
411 friendly bacteria for bioremediation.

#### 412 **Conclusion:**

413 Twenty thermophilic bacteria have been isolated which are capable of toluene  
414 catabolism. Biochemical analysis has revealed other catabolic attributes possessed by  
415 these bacteria which can be exploited for different industrial applications. There is still  
416 need to elucidate the pathways associated with toluene degradation. Study of genes  
417 encoding enzymes, factors as well as conditions contributing to maximum toluene  
418 breakdown would help to exploit their potential in an environmentally favorable way. By  
419 combining knowledge about these attributes of bacteria and bioremediation approach,  
420 toluene degrading potential of these bacteria can be harnessed to mitigate toluene  
421 pollution in the environment.

422

423

424

425 **References**

- 426 1. Ashraf MA. Persistent organic pollutants (POPs): a global issue, a global  
427 challenge. Springer; 2017. p. 4223-7.
- 428 2. Calderon GD, Espitia VI, López DA, Heranadez GE, Huerta GB, Coballase UE,  
429 et al. Effect of toluene and nutritional status on serotonin, lipid peroxidation levels and  
430 Na<sup>+</sup>/K<sup>+</sup>-ATPase in adult rat brain. *Neurochemical research*. 2005;30(5):619-24.
- 431 3. Samanta S, Bhattacharya A, Chowdhury CR, Mahata S, Roy S. In-Vehicular Air  
432 Pollution by Aromatic Compounds Due to Back Diffusion. *International Journal of*  
433 *Engineering Science Invention* 2017.
- 434 4. Ardizzone S, Bianchi CL, Cappelletti G, Naldoni A, Pirola C. Photocatalytic  
435 degradation of toluene in the gas phase: relationship between surface species and catalyst  
436 features. *Environmental science & technology*. 2008;42(17):6671-6.
- 437 5. Greenberg MM. The central nervous system and exposure to toluene: a risk  
438 characterization. *Environmental research*. 1997;72(1):1-7.
- 439 6. Filley CM, Halliday W, Kleinschmidt DBK. The effects of toluene on the central  
440 nervous system. *Journal of Neuropathology & Experimental Neurology*. 2004;63(1):1-  
441 12.
- 442 7. Hannigan JH, Bowen SE. Reproductive toxicology and teratology of abused  
443 toluene. *Systems biology in reproductive medicine*. 2010;56(2):184-200.
- 444 8. Win STT, Fujimaki H. Neurotoxicity of toluene. *Toxicology letters*.  
445 2010;198(2):93-9.
- 446 9. Amin MM, Hatamipour MS, Momenbeik F, Nourmoradi H, Farhadkhani M,  
447 Mohammadi-Moghadam F. Toluene removal from sandy soils via in situ technologies  
448 with an emphasis on factors influencing soil vapor extraction. *The Scientific World*  
449 *Journal*. 2014;2014.
- 450 10. Gholami M, Nassehinia HR, Jonidi-Jafari A, Nasseri S, Esrafil A. Comparison of  
451 Benzene & Toluene removal from synthetic polluted air with use of Nano  
452 photocatalyticTiO<sub>2</sub>/ZNO process. *Journal of Environmental Health Science and*  
453 *Engineering*. 2014;12(1):45.
- 454 11. Shammas NK, Yang JY, Yuan PC, Hung YT. Chemical oxidation.  
455 *Physicochemical Treatment Processes*: Springer; 2005. p. 229-70.
- 456 12. Swaim P, Royce A, Smith T, Maloney T, Ehlen D, Carter B. Effectiveness of UV  
457 advanced oxidation for destruction of micro-pollutants. *Ozone: Science and Engineering*.  
458 2008;30(1):34-42.
- 459 13. Bento FM, Camargo FAO, Okeke BC, Frankenberger WT. Comparative  
460 bioremediation of soils contaminated with diesel oil by natural attenuation,  
461 biostimulation and bioaugmentation. *Bioresource technology*. 2005;96(9):1049-55.
- 462 14. Azubuike CC, Chikere CB, Okpokwasili GC. Bioremediation techniques–  
463 classification based on site of application: principles, advantages, limitations and  
464 prospects. *World Journal of Microbiology and Biotechnology*. 2016;32(11):180.
- 465 15. Copley SD. Evolution of efficient pathways for degradation of anthropogenic  
466 chemicals. *Nature chemical biology*. 2009;5(8):559.
- 467 16. Mukherjee AK, Bordoloi NK. Biodegradation of benzene, toluene, and xylene  
468 (BTX) in liquid culture and in soil by *Bacillus subtilis* and *Pseudomonas aeruginosa*

- 469 strains and a formulated bacterial consortium. *Environmental Science and Pollution*  
470 *Research*. 2012;19(8):3380-8.
- 471 17. Afrouzossadat HA, Emtiazi G, Ghasemi SM, Roghanian R. Isolation and  
472 characterization of a novel toluene-degrading bacterium exhibiting potential application  
473 in bioremediation. *Jundishapur Journal of Microbiology*. 2013.
- 474 18. James C, Natalie S. Microbiology. A laboratory manual: Pearson Education;  
475 2014.
- 476 19. Appelbaum PC, Jacobs MR, Palko WM, Frauenhoffer EE, Duffett A. Accuracy  
477 and reproducibility of the IDS rapID STR system for species identification of  
478 streptococci. *Journal of clinical microbiology*. 1986;23(5):843-6. Pubmed Central  
479 PMID: PMC268734.
- 480 20. Bauer AW, Kirby WM, Sherris JC, Turck M. Antibiotic susceptibility testing by a  
481 standardized single disk method. *American journal of clinical pathology*. 1966;45(4):493.
- 482 21. Sambrook J, Fritsch EF, Maniatis T. Molecular cloning: a laboratory manual:  
483 Cold spring harbor laboratory press; 1989.
- 484 22. Sievers F, Higgins DG. Clustal Omega, accurate alignment of very large numbers  
485 of sequences. *Multiple sequence alignment methods*: Springer; 2014. p. 105-16.
- 486 23. Lazaroaie MM. Multiple responses of gram-positive and gram-negative bacteria  
487 to mixture of hydrocarbons. *Brazilian Journal of Microbiology*. 2010;41(3):649-67.
- 488 24. Park BG, Shin WS, Chung JS. Simultaneous biofiltration of H<sub>2</sub>S, NH<sub>3</sub> and toluene  
489 using an inorganic/polymeric composite carrier. *Environmental Engineering Research*.  
490 2008;13(1):19-27.
- 491 25. Janda JM, Abbott SL. 16S rRNA gene sequencing for bacterial identification in  
492 the diagnostic laboratory: pluses, perils, and pitfalls. *Journal of clinical microbiology*.  
493 2007;45(9):2761-4. Pubmed Central PMID: PMC2045242
- 494 26. Assinder SJ, Williams PA. The TOL plasmids: determinants of the catabolism of  
495 toluene and the xylenes. *Advances in microbial physiology*. 31: Elsevier; 1990. p. 1-69.
- 496 27. Dobsław D, Engesser KH. Degradation of toluene by ortho cleavage enzymes in  
497 *Burkholderia fungorum* FLU100. *Microbial biotechnology*. 2015;8(1):143-54.
- 498 28. Souza EC, Vessoni PTC, Arni SA, Domínguez JM, Converti A, Oliveira RP.  
499 Influence of toluene and salinity on biosurfactant production by *Bacillus* sp.: scale up  
500 from flasks to a bench-scale bioreactor. *Brazilian Journal of Chemical Engineering*.  
501 2017;34(2):395-405.
- 502 29. Kongpol A, Pongtharangkul T, Kato J, Honda K, Ohtake H, Vangnai AS.  
503 Characterization of an organic-solvent-tolerant *Brevibacillus agri* strain 13 able to  
504 stabilize solvent/water emulsion. *FEMS microbiology letters*. 2009;297(2):225-33.
- 505 30. Kundan R, Raghuvanshi S, Bhatt A, Bhatt M, Agrawal PK. Toluene Degrading  
506 Bacteria from the Rhizosphere of *Solanum melongena* Contaminated with Polycyclic  
507 Aromatic Hydrocarbon. *International Journal of Current Microbiology and Applied*  
508 *Sciences*. 2017;6(4):2060-79.
- 509 31. Nahar N. Characterization of activated sludge bacteria capable of growth on  
510 toluene and other aromatic compounds: Dublin City University; 1994.
- 511 32. Rani V, Mohanram S, Tiwari R, Nain L, Arora A. Beta-glucosidase: key enzyme  
512 in determining efficiency of cellulase and biomass hydrolysis. *Journal of Bioprocessing*  
513 *and Biotechniques*. 2014;5(197):2.

- 514 33. Singh RS, Chauhan K, Kennedy JF. A panorama of bacterial inulinases:  
515 production, purification, characterization and industrial applications. *International*  
516 *journal of biological macromolecules*. 2017;96:312-22.
- 517 34. Liew SM, Tay ST, Wongratanacheewin S, Puthucheary SD. Enzymatic profiling  
518 of clinical and environmental isolates of *Burkholderia pseudomallei*. *Trop Biomed*.  
519 2012;29(1):160-8.
- 520 35. Scigelova M, Crout DHG. Microbial  $\beta$ -N-acetylhexosaminidases and their  
521 biotechnological applications. *Enzyme and Microbial Technology*. 1999;25(1-2):3-14.
- 522 36. Nalini P, Ellaiiah P, Prabhakar T, Girijasankar G. Microbial alkaline phosphatases  
523 in bioprocessing. *International Journal of Current Microbiology and Applied Sciences*.  
524 2015;4(3):384-96.
- 525 37. Awade AC, Cleuziat P, Gonzales TH, Robert BJ. Pyrrolidone carboxyl peptidase  
526 (Pcp): An enzyme that removes pyroglutamic acid (pGlu) from pGlu-peptides and pGlu-  
527 proteins. *Proteins: Structure, Function, and Bioinformatics*. 1994;20(1):34-51.
- 528 38. Jacob JH, Irshaid FI. Toluene Biodegradation by Novel Bacteria Isolated from  
529 Polluted Soil Surrounding Car Body Repair and Spray Painting Workshops. *Journal of*  
530 *Environmental Protection*. 2015;6(12):1417.
- 531 39. Wang L, Shao ZZ. Isolation and characterization of 4 benzene/toluene-degrading  
532 bacterial strains and detection of related degradation genes. *Acta microbiologica Sinica*.  
533 2006;46(5):753-7. Pubmed Central PMCID: 17172023.
- 534 40. Daugulis AJ, Boudreau NG. Removal and destruction of high concentrations of  
535 gaseous toluene in a two-phase partitioning bioreactor by *Alcaligenes xylosoxidans*.  
536 *Biotechnology letters*. 2003;25(17):1421-4.
- 537 41. Pacheco GJ, Ciapina EMP, Gomes EB, Pereira J N. Biosurfactant production by  
538 *Rhodococcus erythropolis* and its application to oil removal. *Brazilian Journal of*  
539 *Microbiology*. 2010;41(3):685-93.
- 540 42. Zhang H, Pennisi SV, Kays SJ, Habteselassie MY. Isolation and identification of  
541 toluene-metabolizing bacteria from rhizospheres of two indoor plants. *Water, Air, & Soil*  
542 *Pollution*. 2013;224(9):1648.
- 543 43. Heydarnezhad F, Hoodaji M, Shahriarinnour M, Tahmourespour A, Shariati S.  
544 Optimizing Toluene Degradation by Bacterial Strain Isolated from Oil-Polluted Soils.  
545 *Polish Journal of Environmental Studies*. 2018;27(2).
- 546 44. Meyer CI, Martinez L, Marin CV, Böhnke S, Harms H, Müller JA, et al. Isolation  
547 and characterization of *Magnetospirillum* sp. strain 15-1 as a representative anaerobic  
548 toluene-degrader from a constructed wetland model. *PloS one*. 2017;12(4):e0174750.
- 549 45. Hamzah AO, Tavakoli A, Rabu A. Detection of toluene degradation in bacteria  
550 isolated from oil contaminated soils. *Sains Malays*. 2011;40(11):1231-5.
- 551 46. Kim JM, Jeon CO. Isolation and characterization of a new benzene, toluene, and  
552 ethylbenzene degrading bacterium, *Acinetobacter* sp. B113. *Current microbiology*.  
553 2009;58(1):70-5.
- 554 47. Perez S, Rosa M, Ábalos RA, Gómez MOJM, Cantero MD. Biodegradation of  
555 crude oil by *Pseudomonas aeruginosa* AT18 strain. *Tecnologia Quimica*. 2006;26(1).
- 556 48. Shinoda Y, Sakai Y, Uenishi H, Uchihashi Y, Hiraishi A, Yukawa H, et al.  
557 Aerobic and anaerobic toluene degradation by a newly isolated denitrifying bacterium,  
558 *Thauera* sp. strain DNT-1. *Applied and Environmental Microbiology*. 2004;70(3):1385-  
559 92.

- 560 49. Newman LM, Wackett LP. Purification and characterization of toluene 2-  
561 monooxygenase from *Burkholderia cepacia* G4. *Biochemistry*. 1995;34(43):14066-76.
- 562 50. Tao Y, Fishman A, Bentley WE, Wood TK. Oxidation of benzene to phenol,  
563 catechol, and 1, 2, 3-trihydroxybenzene by toluene 4-monooxygenase of *Pseudomonas*  
564 *mendocina* KR1 and toluene 3-monooxygenase of *Ralstonia pickettii* PKO1. *Applied and*  
565 *Environmental Microbiology*. 2004;70(7):3814-20.
- 566 51. Whited GM, Gibson DT. Separation and partial characterization of the enzymes  
567 of the toluene-4-monooxygenase catabolic pathway in *Pseudomonas mendocina* KR1.  
568 *Journal of bacteriology*. 1991;173(9):3017-20.
- 569 52. Lau PCK, Wang Y, Patel A, Labbé D, Bergeron H, Brousseau R, et al. A bacterial  
570 basic region leucine zipper histidine kinase regulating toluene degradation. *Proceedings*  
571 *of the National Academy of Sciences*. 1997;94(4):1453-8. Pubmed Central PMCID:  
572 PMC19812.
- 573
- 574
- 575
- 576
- 577
- 578
- 579
- 580
- 581

582 **Table 1:** Toluene metabolizing bacteria

583

584

| <b>Bacterial species</b>                                                  | <b>Source</b>                                   | <b>Reference</b> |
|---------------------------------------------------------------------------|-------------------------------------------------|------------------|
| <i>Bacillus cereus</i> THH39                                              | Oil polluted soils                              | (43)             |
| <i>Magnetospirillum</i> sp. strain 15-1                                   | Rhizospheres of constructed wetlands.           | (44)             |
| <i>Bacterium</i> Ex-DG74                                                  | Wastewater                                      | (17)             |
| <i>Pseudomonas aeruginosa</i> UKMP-14T and <i>Bacillus cereus</i> UKMP-6G | oil contaminated soil                           | (45)             |
| <i>Acinetobacter genospecies</i> Tol 5                                    | gasoline contaminated sediment at a gas station | (46)             |
| <i>Pseudomonas aeruginosa</i> AT18                                        | crude oil contaminated soil                     | (47)             |

585

586

587

588

589

590

591

592

593

594

595

596

597

598

599



600 **Table 2:** Pathways for aerobic oxidation of toluene

601

| <b>Pathway</b>                        | <b>Bacteria</b>                     | <b>Reference</b> |
|---------------------------------------|-------------------------------------|------------------|
| Dioxygenase mediated pathway          | <i>Thauera</i> species strain DNT-1 | (48)             |
| Toluene-2-monooxygenase pathway (TOM) | <i>Burkholderia cepacia</i> G4      | (49)             |
| Toluene-3-monooxygenase pathway (TBU) | <i>Ralstonia pickettii</i> PKO1     | (50)             |
| Toluene-4-monooxygenase pathway (TMO) | <i>Pseudomonas mendocina</i> KR1    | (51)             |
| Ortho cleavage pathway                | <i>Pseudomonas mendocina</i> KR1    | (27)             |
| Meta cleavage pathway via catechol    | <i>Burkholderia cepacia</i> G4      | (26)             |
| Tod pathway                           | <i>Pseudomonas putida</i> F1        | (52)             |

602

603

604

605

606

607

608

609

610

611

612

613

614

615

616

617

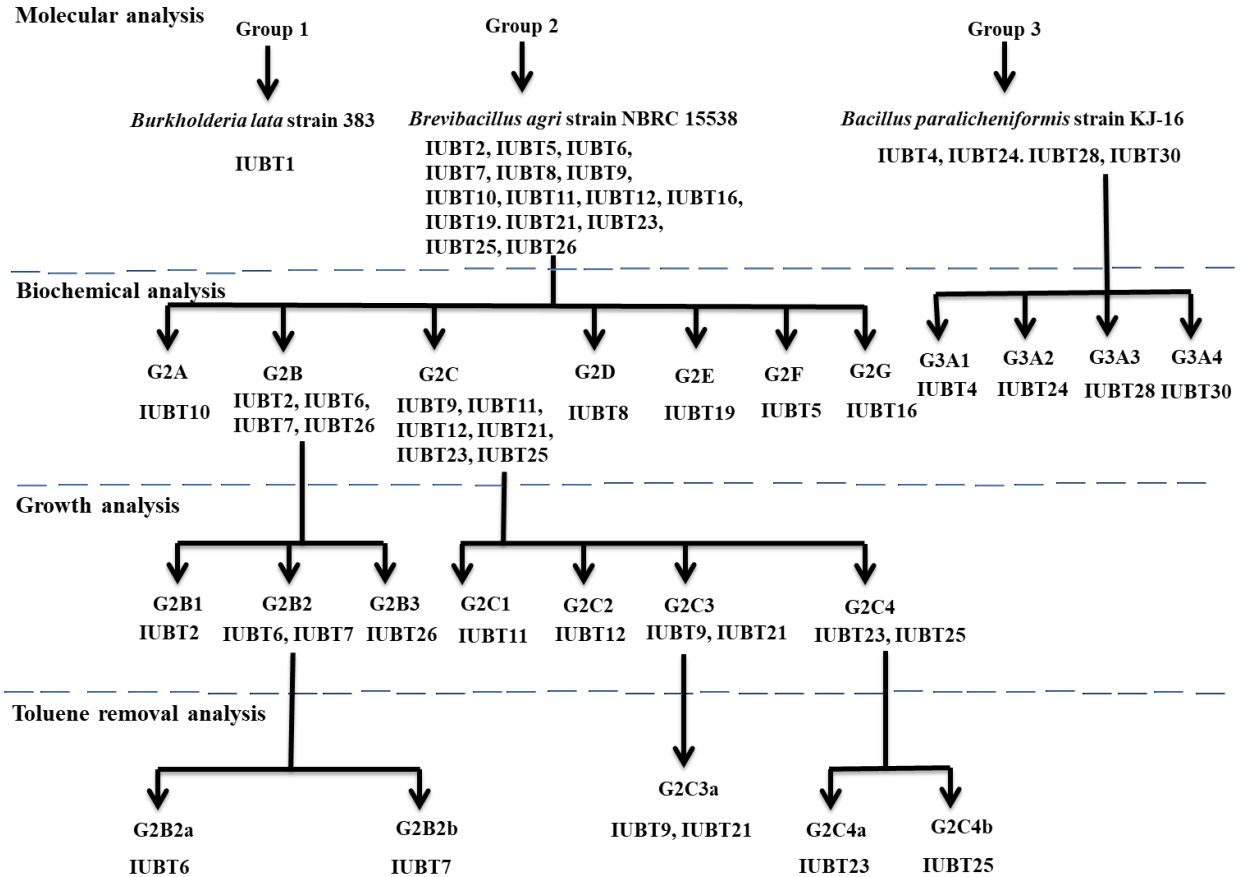

618

619 **Figure 1: Flowsheet for twenty toluene metabolizing bacteria:** The molecular,  
 620 biochemical, growth pattern and toluene removal analysis data showed eighteen bacteria  
 621 IUBT1, IUBT2, IUBT4, IUBT5, IUBT6, IUBT7, IUBT8, IUBT9, IUBT10, IUBT11,  
 622 IUBT12, IUBT16, IUBT23, IUBT24, IUBT25, IUBT26, IUBT28, IUBT30 were unique.  
 623 And two bacteria IUBT9 and IUBT21 might be the same on the basis of similarity in  
 624 their toluene removal efficiencies.

625

626

627

628

629

630

631

632

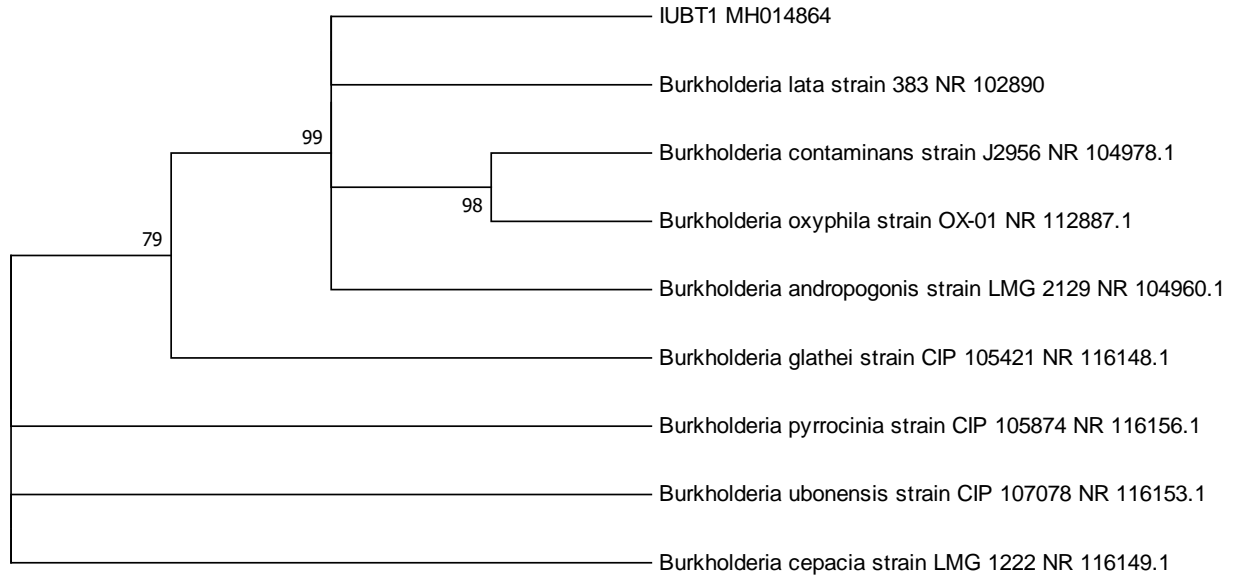

633

634 **Figure 2:** Neighbour joining tree based on 16S rRNA gene sequence for IUBT1 and its  
635 closest relatives. Numbers with the tree nodes are depicting percentage bootstrap support  
636 for 1000 replicates.

637

638

639

640

641

642

643

644

645

646

647

648

649

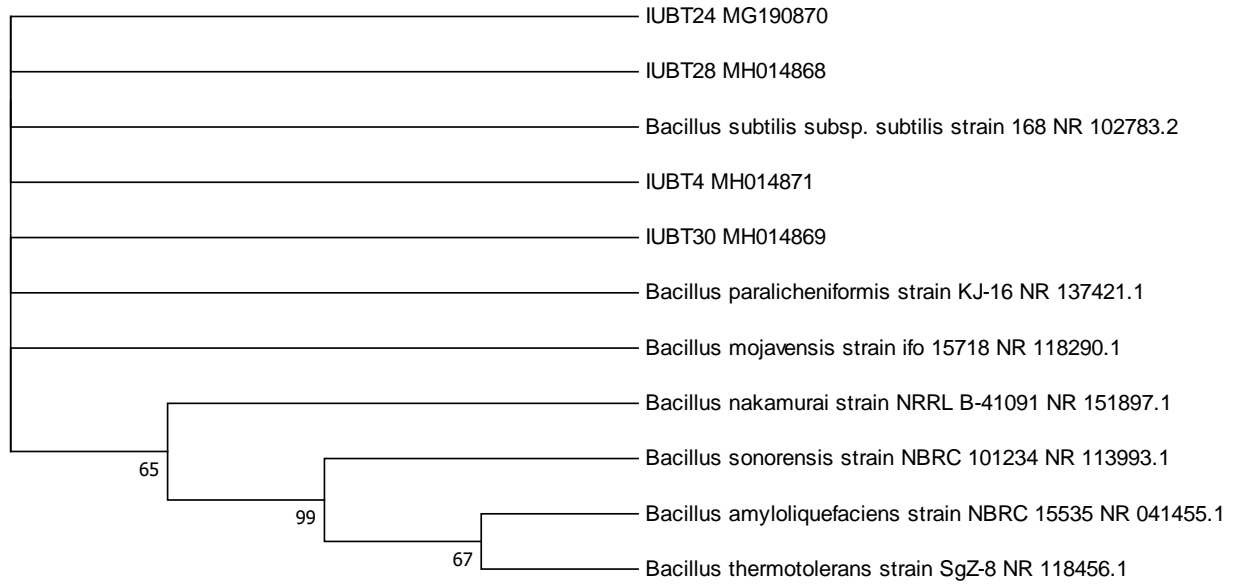

650

651

652 **Figure 3:** Neighbour joining tree illustrating the evolutionary relationship between

653 IUBT4, IUBT24, IUBT28, IUBT30 and other related strains.

654

655

656

657

658

659

660

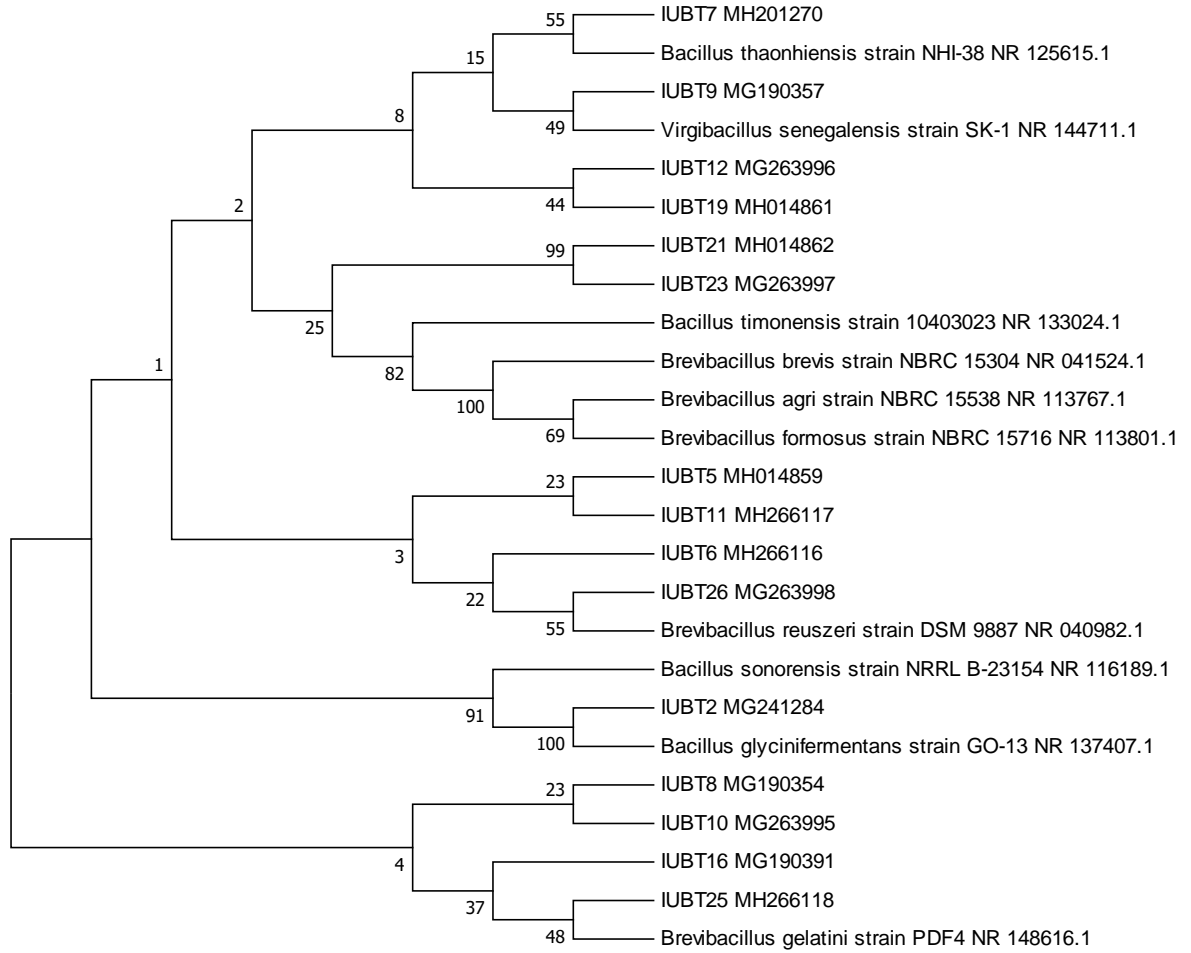

661

662 **Figure 4:**

663 Neighbour joining tree illustrating phylogenetic relationship of isolates assigned to genus

664 *Brevibacillus* and other related strains.

665

666
